# Supplementary material
Source: PubMed Central journal article supplement (PMC7833078)
Supplement: mmc1.pdf [file mmc1.pdf]

# THE LANCET

## Infectious Diseases

### Supplementary appendix

This appendix formed part of the original submission and has been peer reviewed.  
We post it as supplied by the authors.

Supplement to: Koehler P, Bassetti M, Chakrabarti A, et al. Defining and managing COVID-19-associated pulmonary aspergillosis: the 2020 ECMM/ISHAM consensus criteria for research and clinical guidance. *Lancet Infect Dis* 2020; published online Dec 14. [https://doi.org/10.1016/S1473-3099\(20\)30847-1](https://doi.org/10.1016/S1473-3099(20)30847-1).

Supplemental Material to manuscript entitled

**Defining and Managing COVID-19 Associated Pulmonary Aspergillosis: The 2020 ECMM/ISHAM  
Consensus Criteria for Research and Clinical Guidance**

Table of Contents

|                                            |   |
|--------------------------------------------|---|
| <b>Mandatory Supportive Measures</b> ..... | 1 |
| <b>References</b> .....                    | 2 |
| <b>Supplemental figure</b> .....           | 3 |
| <b>Figure S1 CT Imaging</b> .....          | 3 |

## **Mandatory Supportive Measures**

Observational studies suggest that CAPA develops through the disease course predominantly in patients in the ICU and with ARDS, in whom optimal respiratory management often determines patient outcome.<sup>1,2</sup> Guidance on the management of COVID-19 associated ARDS is in development or has been issued by several societies, organizations and experts.<sup>3-5</sup> Importantly, these guidelines are largely based on experiences in the management of ARDS caused by other pathogens, in particular influenza and only limited data and case series of patients with COVID-19 are available to date.<sup>6-8</sup> In brief, early prone positioning, including self-proning in non-intubated patients and the use of non-invasive techniques as high flow oxygen delivered via nasal cannulas (HFNC) or non-invasive ventilation (NIV) have proven useful in COVID-19 patients with mild ARDS and can safely be applied with appropriate barrier precautions and close monitoring.<sup>9-11</sup>

Upon respiratory deterioration, early intubation and lung protective ventilation is warranted. Prone positioning during mechanical ventilation in patients with severe ARDS ( $\geq 16$  hours per day) is effective and might be beneficial even in some patients with only mild to moderate ARDS.<sup>12,13</sup> Veno-venous ECMO may be considered as rescue strategy in patients with refractory respiratory failure. However, whether ECMO is beneficial during COVID-19 triggered cytokine storm or hypercoagulability is yet unclear.

## References

1. Koehler P, Cornely OA, Bottiger BW, et al. COVID-19 associated pulmonary aspergillosis. *Mycoses* 2020; **63**(6): 528-34.
2. Alanio A, Dellière S, Fodil S, Bretagne S, Mégarbane B. Prevalence of putative invasive pulmonary aspergillosis in critically ill patients with COVID-19. *Lancet Respir Med*. 2020 Jun; **8**(6): e48-e49.doi: 10.1016/S2213-2600(20)30237-X.
3. Fan E, Beitler JR, Brochard L, et al. COVID-19-associated acute respiratory distress syndrome: is a different approach to management warranted? *Lancet Respir Med*. 2020; **8** (8): 816-21.
4. Kluge S, Janssens U, Welte T, Weber-Carstens S, Marx G, Karagiannidis C. German recommendations for critically ill patients with COVID-19. *Med Klin Intensivmed Notfmed*. 2020; **115**(3): 175-177.
5. WHO - Clinical management of COVID-19 interim guidance. 2020; <https://apps.who.int/iris/rest/bitstreams/1278777/retrieve>; Last assessed 06. August 2020.
6. Berlin DA, Gulick RM, Martinez FJ. Severe Covid-19. *N Engl J Med* 2020. doi: 10.1056/NEJMc2009575
7. Fan E, Del Sorbo L, Goligher EC, et al. An Official American Thoracic Society/European Society of Intensive Care Medicine/Society of Critical Care Medicine Clinical Practice Guideline: Mechanical Ventilation in Adult Patients with Acute Respiratory Distress Syndrome. *Am J Respir Crit Care Med*; **195**(9): 1253-1263.
8. Force ADT, Ranieri VM, Rubenfeld GD, et al. Acute respiratory distress syndrome: the Berlin Definition. *JAMA*; **307**(23): 2526-33. 2012.
9. Coppo A, Bellani G, Winterton D, et al. Feasibility and physiological effects of prone positioning in non-intubated patients with acute respiratory failure due to COVID-19 (PRON-COVID): a prospective cohort study. *Lancet Respir Med*. 2020; **8**(8): 765-774.
10. Telias I, Katira BH, Brochard L. Is the Prone Position Helpful During Spontaneous Breathing in Patients With COVID-19? *JAMA*. 2020; **323**(22): 2265-7.
11. Li J, Fink JB, Ehrmann S. High-flow nasal cannula for COVID-19 patients: low risk of bio-aerosol dispersion. *Eur Respir J*. 2020;**55**(5): 2000892.doi: 10.1183/13993003.00892-2020.
12. Guerin C, Reignier J, Richard JC, et al. Prone positioning in severe acute respiratory distress syndrome. *N Engl J Med* 2013; **368**(23): 2159-68.
13. Bellani G, Laffey JG, Pham T, et al. Epidemiology, Patterns of Care, and Mortality for Patients With Acute Respiratory Distress Syndrome in Intensive Care Units in 50 Countries. *JAMA*. 2016; **315**(8): 788-800.

**Supplemental figure**

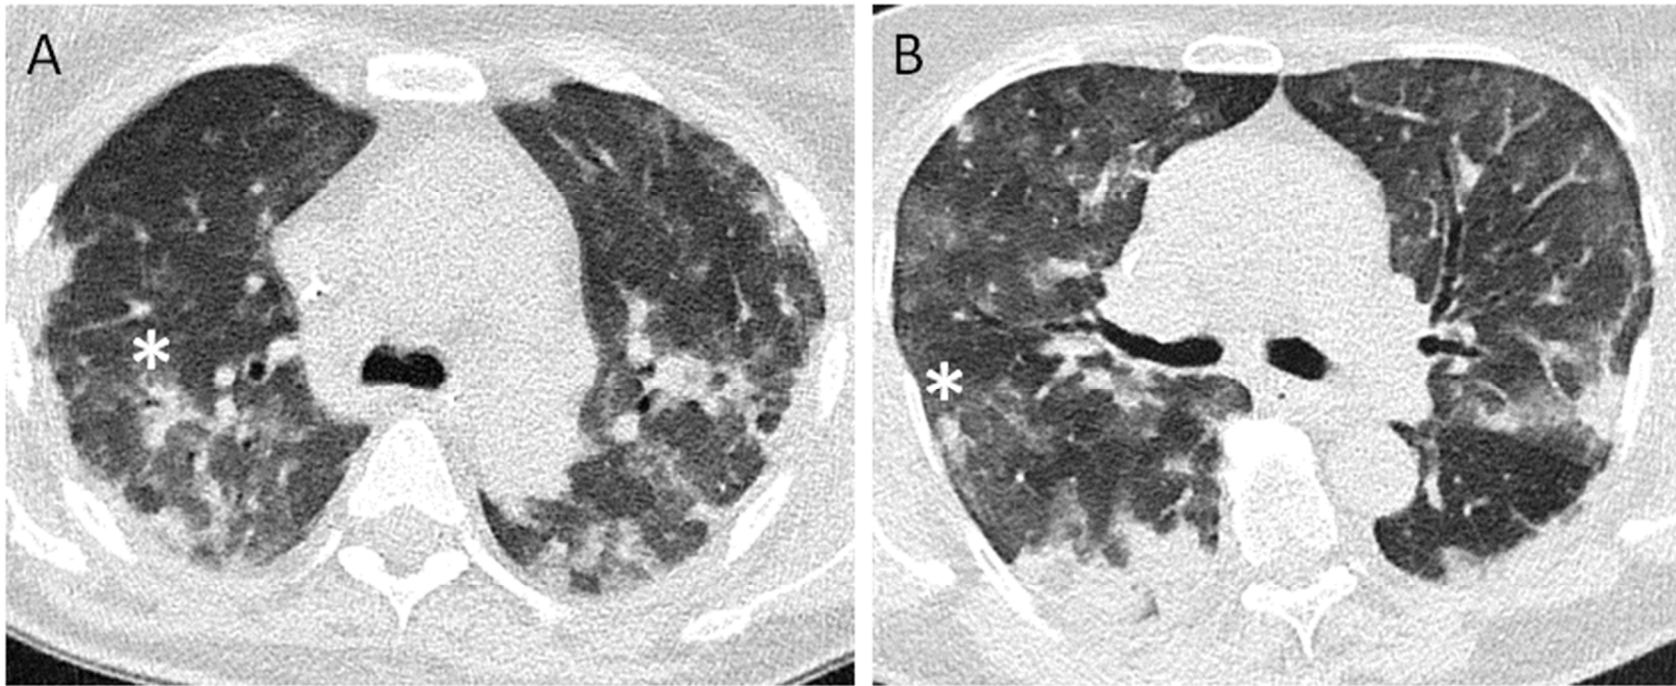

**Figure S1 CT Imaging**

Low-dose CT from COVID-19 patients with A) confirmed aspergillosis and B) without fungal infection. In both patients, focal nodular consolidations with adjacent ground glass opacities (\*) as one frequent finding in pulmonary aspergillosis are present, underlining low specificity in peak and late COVID-19 stages.
